# Supplementary material for: To Share or Not to Share? A Survey of Biomedical Researchers in the U.S. Southwest, an Ethnically Diverse Region
Source: PubMed Central journal article supplement (PMC4574947; doi:10.1371/journal.pone.0138239), 2015-09-17
Supplement: pone.0138239.s002.pdf [file pone.0138239.s002.pdf]

## Supporting Information for

### To Share or Not to Share?

#### A survey of biomedical researchers in the U.S. southwest, an ethnically diverse region

Mai H. Oushy<sup>1</sup>, Rebecca Palacios<sup>2</sup>, Alan E. C. Holden<sup>3</sup>, Amelie G. Ramirez<sup>3</sup>,  
Kipling J. Gallion<sup>3</sup>, and Mary A. O'Connell<sup>1,\*</sup>

<sup>1</sup>Plant and Environmental Sciences, New Mexico State University, Las Cruces, NM 88003 USA

<sup>2</sup>Public Health Sciences, New Mexico State University, Las Cruces, NM 88003 USA

<sup>3</sup>Institute for Health Promotion Research, University of Texas Health Science Center, San Antonio, TX 78229 USA

**S2 Table.** Thematic list of perceived reasons individuals refuse to donate specimens (n=28)

| <b>Themes</b>                          | <b>N (%)</b> |
|----------------------------------------|--------------|
| <i>Inconvenience</i>                   | 13 (46.4)    |
| <i>Health concerns</i>                 | 12 (42.9)    |
| <i>Recruitment barriers</i>            | 9 (32.1)     |
| <i>Privacy and security barriers</i>   | 9 (32.1)     |
| <i>Misuse of personal information</i>  | 8 (28.6)     |
| <i>Distrust in health care system</i>  | 7 (25.0)     |
| Cultural and religious barriers        | 4 (14.3)     |
| Consent barriers                       | 3 (10.7)     |
| Lack of personal benefits              | 3 (10.7)     |
| IRB barriers                           | 2 (7.1)      |
| Negative societal and insurance impact | 2 (7.1)      |
| No reason reported                     | 1 (3.6)      |
