# Supplementary material for: To Share or Not to Share? A Survey of Biomedical Researchers in the U.S. Southwest, an Ethnically Diverse Region
Source: PubMed Central journal article supplement (PMC4574947; doi:10.1371/journal.pone.0138239), 2015-09-17
Supplement: pone.0138239.s004.pdf [file pone.0138239.s004.pdf]

## Supporting Information for

### To Share or Not to Share?

#### A survey of biomedical researchers in the U.S. southwest, an ethnically diverse region

Mai H. Oushy<sup>1</sup>, Rebecca Palacios<sup>2</sup>, Alan E. C. Holden<sup>3</sup>, Amelie G. Ramirez<sup>3</sup>,  
Kipling J. Gallion<sup>3</sup>, and Mary A. O'Connell<sup>1,\*</sup>

<sup>1</sup>Plant and Environmental Sciences, New Mexico State University, Las Cruces, NM 88003 USA

<sup>2</sup>Public Health Sciences, New Mexico State University, Las Cruces, NM 88003 USA

<sup>3</sup>Institute for Health Promotion Research, University of Texas Health Science Center, San Antonio, TX 78229 USA

**S4 Table.** Thematic list of concerns if unwilling to share specimens (n=32)

| <b>Themes</b>                                | <b>N (%)</b> |
|----------------------------------------------|--------------|
| <i>Plausibility of research</i>              | 12 (37.5)    |
| <i>Intellectual property rights</i>          | 7 (21.9)     |
| <i>Legitimacy and lack of IRB approval</i>   | 7 (21.9)     |
| <i>Costs/reimbursements</i>                  | 7 (21.9)     |
| <i>Sample issues</i>                         | 7 (21.9)     |
| <i>Lack of expertise in tissue research</i>  | 5 (15.6)     |
| HIPPA barriers                               | 2 (6.3)      |
| Donor not notified of beneficial information | 2 (6.3)      |
| No benefit                                   | 1 (3.1)      |
| No reason given                              | 1(3.1)       |
